# Supplementary material
Source: MDPI journal article supplement (https://www.mdpi.com/2073-445X/12/1/235)
Supplement: s1 [file s1]

Table.S1: The vegetation coverage and its change value and ranking of built-up areas in provincial capital cities from 1990 to 2020

| City/year    | 1990  | 1995  | 2000  | 2005  | 2010  | 2015  | 2020  | FVC change value (%) | GDP rank | Expansion speed rank | FVC rank |
|--------------|-------|-------|-------|-------|-------|-------|-------|----------------------|----------|----------------------|----------|
| Shanghai     | 33.01 | 35.11 | 37.16 | 33.69 | 42.21 | 43.94 | 47.96 | 14.95                | 1        | 2                    | 3        |
| Beijing      | 37.62 | 36.44 | 34.92 | 38.64 | 40.87 | 51.24 | 50.30 | 12.68                | 2        | 1                    | 1        |
| Guangzhou    | 39.98 | 37.45 | 34.65 | 39.15 | 41.26 | 44.13 | 45.95 | 5.97                 | 3        | 3                    | 5        |
| Chongqing    | 31.14 | 36.11 | 36.34 | 33.79 | 34.32 | 44.48 | 41.93 | 10.79                | 4        | 15                   | 19       |
| Chengdu      | 46.19 | 35.74 | 39.19 | 31.35 | 32.58 | 39.76 | 43.76 | -2.43                | 5        | 8                    | 12       |
| Hangzhou     | 37.80 | 35.57 | 33.35 | 40.50 | 32.07 | 35.83 | 45.02 | 7.22                 | 6        | 4                    | 8        |
| Wuhan        | 37.70 | 34.51 | 37.31 | 41.94 | 39.93 | 45.63 | 43.96 | 6.25                 | 7        | 7                    | 10       |
| Nanjing      | 40.87 | 38.35 | 33.80 | 36.31 | 44.53 | 42.42 | 45.32 | 4.46                 | 8        | 9                    | 7        |
| Tianjin      | 33.81 | 38.95 | 40.31 | 35.53 | 38.77 | 39.76 | 48.74 | 14.93                | 9        | 5                    | 2        |
| Changsha     | 37.99 | 37.97 | 37.37 | 40.04 | 34.57 | 40.16 | 40.25 | 2.27                 | 10       | 16                   | 21       |
| Zhengzhou    | 37.97 | 45.02 | 36.00 | 37.71 | 35.10 | 42.54 | 43.68 | 5.70                 | 11       | 6                    | 13       |
| Jinan        | 37.28 | 43.27 | 27.65 | 42.32 | 48.84 | 39.71 | 47.84 | 10.57                | 12       | 10                   | 4        |
| Hefei        | 44.28 | 44.73 | 43.07 | 44.41 | 33.13 | 42.66 | 45.77 | 1.48                 | 13       | 14                   | 6        |
| Xi'an        | 25.19 | 34.92 | 40.45 | 31.83 | 33.30 | 38.44 | 38.36 | 13.17                | 14       | 11                   | 25       |
| Fuzhou       | 41.41 | 40.49 | 42.27 | 33.36 | 37.30 | 40.68 | 40.64 | -0.77                | 15       | 19                   | 20       |
| Kunming      | 28.17 | 28.10 | 30.20 | 32.63 | 39.74 | 35.71 | 35.64 | 7.47                 | 16       | 18                   | 26       |
| Changchun    | 17.71 | 32.23 | 31.55 | 35.42 | 33.54 | 37.66 | 38.61 | 20.89                | 17       | 17                   | 23       |
| Shenyang     | 29.41 | 30.31 | 30.46 | 35.91 | 37.87 | 39.64 | 43.58 | 14.17                | 18       | 12                   | 14       |
| Shijiazhuang | 33.04 | 35.60 | 45.94 | 32.91 | 36.43 | 37.54 | 43.98 | 10.95                | 19       | 13                   | 9        |
| Nanchang     | 31.73 | 36.09 | 37.85 | 33.86 | 39.28 | 38.87 | 39.42 | 7.68                 | 20       | 21                   | 22       |
| Harbin       | 35.47 | 33.97 | 40.57 | 35.75 | 35.82 | 37.22 | 43.78 | 8.31                 | 21       | 20                   | 11       |
| Nanning      | 41.71 | 43.72 | 42.56 | 41.65 | 44.10 | 43.00 | 42.05 | 0.34                 | 22       | 26                   | 18       |
| Guiyang      | 32.69 | 28.23 | 32.76 | 33.97 | 36.71 | 39.76 | 42.97 | 10.27                | 23       | 22                   | 17       |
| Taiyuan      | 37.20 | 35.43 | 28.54 | 34.28 | 34.70 | 41.50 | 43.52 | 6.32                 | 24       | 23                   | 15       |
| Urumqi       | 30.15 | 24.60 | 28.48 | 28.56 | 22.77 | 32.10 | 32.10 | 1.95                 | 25       | 24                   | 30       |
| Lanzhou      | 27.89 | 30.00 | 37.99 | 28.61 | 31.62 | 28.52 | 32.30 | 4.41                 | 26       | 29                   | 29       |
| Hohhot       | 15.54 | 11.86 | 24.94 | 18.59 | 29.10 | 30.97 | 33.94 | 18.40                | 27       | 27                   | 28       |
| Yinchuan     | 25.18 | 29.11 | 28.11 | 26.62 | 35.02 | 34.00 | 34.84 | 9.67                 | 28       | 25                   | 27       |
| Haikou       | 43.88 | 36.39 | 40.23 | 40.86 | 34.76 | 35.20 | 43.18 | -0.71                | 29       | 28                   | 16       |
| Xining       | 27.83 | 26.41 | 31.95 | 33.79 | 37.49 | 35.84 | 38.43 | 10.61                | 30       | 30                   | 24       |
| Lhasa        | 21.49 | 21.14 | 28.59 | 28.89 | 29.34 | 23.21 | 30.59 | 9.10                 | 31       | 31                   | 31       |

Table.S2: The total area and vegetation coverage of built-up areas in provincial capital cities from 1990 to 2020

| City/year    | 1990     |      | 1995     |      | 2000     |      | 2005     |      | 2010     |      | 2015     |      | 2020     |      |
|--------------|----------|------|----------|------|----------|------|----------|------|----------|------|----------|------|----------|------|
|              | Area:km2 | VCR  |
| Shanghai     | 394.71   | 0.31 | 544.42   | 0.32 | 763.70   | 0.37 | 1478.30  | 0.30 | 2339.95  | 0.41 | 2893.43  | 0.50 | 3970.61  | 0.57 |
| Beijing      | 744.13   | 0.38 | 850.13   | 0.37 | 1008.45  | 0.34 | 1884.49  | 0.41 | 2821.61  | 0.45 | 3237.89  | 0.58 | 4491.65  | 0.60 |
| Guangzhou    | 176.45   | 0.42 | 326.28   | 0.38 | 662.92   | 0.36 | 1100.46  | 0.41 | 1733.52  | 0.46 | 1874.89  | 0.48 | 2516.18  | 0.51 |
| Chongqing    | 110.94   | 0.31 | 137.96   | 0.36 | 171.93   | 0.36 | 256.17   | 0.34 | 428.93   | 0.34 | 474.81   | 0.44 | 829.84   | 0.42 |
| Chengdu      | 164.64   | 0.50 | 255.02   | 0.36 | 379.47   | 0.42 | 597.11   | 0.28 | 990.52   | 0.30 | 1080.70  | 0.42 | 1479.05  | 0.47 |
| Hangzhou     | 87.88    | 0.39 | 112.62   | 0.37 | 198.80   | 0.32 | 486.20   | 0.42 | 868.89   | 0.30 | 1212.31  | 0.36 | 1852.17  | 0.51 |
| Wuhan        | 211.39   | 0.39 | 237.14   | 0.34 | 302.31   | 0.39 | 435.69   | 0.48 | 671.71   | 0.44 | 897.63   | 0.58 | 1556.65  | 0.51 |
| Nanjing      | 190.98   | 0.46 | 277.53   | 0.41 | 338.62   | 0.33 | 586.07   | 0.37 | 875.33   | 0.49 | 1015.72  | 0.47 | 1257.78  | 0.52 |
| Tianjin      | 313.77   | 0.31 | 380.98   | 0.40 | 462.16   | 0.41 | 827.44   | 0.34 | 1479.35  | 0.41 | 1634.76  | 0.50 | 2009.37  | 0.56 |
| Changsha     | 56.05    | 0.41 | 75.04    | 0.40 | 106.16   | 0.40 | 227.42   | 0.44 | 358.08   | 0.34 | 444.01   | 0.43 | 727.49   | 0.45 |
| Zhengzhou    | 185.20   | 0.40 | 237.29   | 0.53 | 296.31   | 0.40 | 491.78   | 0.41 | 672.06   | 0.35 | 935.58   | 0.47 | 1857.52  | 0.51 |
| Jinan        | 220.40   | 0.40 | 295.48   | 0.49 | 370.18   | 0.20 | 549.95   | 0.47 | 811.24   | 0.62 | 947.19   | 0.43 | 1263.99  | 0.54 |
| Hefei        | 191.95   | 0.65 | 250.00   | 0.60 | 329.36   | 0.56 | 388.72   | 0.49 | 546.79   | 0.33 | 623.46   | 0.49 | 919.72   | 0.54 |
| Xi'an        | 138.44   | 0.17 | 381.45   | 0.35 | 446.33   | 0.46 | 543.22   | 0.30 | 744.50   | 0.31 | 728.01   | 0.40 | 1058.79  | 0.37 |
| Fuzhou       | 82.02    | 0.43 | 117.76   | 0.42 | 158.71   | 0.45 | 190.34   | 0.32 | 280.40   | 0.38 | 541.64   | 0.44 | 667.97   | 0.44 |
| Kunming      | 69.39    | 0.26 | 116.85   | 0.24 | 191.02   | 0.28 | 306.78   | 0.31 | 405.49   | 0.41 | 539.00   | 0.36 | 712.38   | 0.36 |
| Changchun    | 114.57   | 0.03 | 148.01   | 0.30 | 183.83   | 0.29 | 247.96   | 0.35 | 374.01   | 0.32 | 431.85   | 0.40 | 765.82   | 0.42 |
| Shenyang     | 182.68   | 0.25 | 216.87   | 0.27 | 246.55   | 0.28 | 350.29   | 0.35 | 520.50   | 0.39 | 653.01   | 0.43 | 1007.77  | 0.49 |
| Shijiazhuang | 101.01   | 0.32 | 150.33   | 0.36 | 256.69   | 0.38 | 319.59   | 0.30 | 446.79   | 0.36 | 565.20   | 0.37 | 858.96   | 0.49 |
| Nanchang     | 51.10    | 0.30 | 95.77    | 0.38 | 110.97   | 0.41 | 180.92   | 0.34 | 294.13   | 0.42 | 371.76   | 0.41 | 547.81   | 0.42 |
| Harbin       | 164.66   | 0.36 | 177.92   | 0.34 | 206.25   | 0.42 | 270.65   | 0.36 | 378.74   | 0.37 | 443.30   | 0.39 | 741.33   | 0.53 |
| Nanning      | 139.28   | 0.53 | 157.91   | 0.48 | 191.60   | 0.48 | 229.62   | 0.45 | 409.91   | 0.48 | 443.99   | 0.45 | 519.39   | 0.45 |
| Guiyang      | 11.24    | 0.24 | 52.09    | 0.24 | 67.46    | 0.29 | 90.26    | 0.32 | 176.33   | 0.38 | 265.78   | 0.40 | 490.49   | 0.46 |
| Taiyuan      | 208.87   | 0.39 | 302.57   | 0.36 | 345.85   | 0.17 | 392.51   | 0.32 | 473.38   | 0.36 | 624.08   | 0.47 | 640.39   | 0.49 |
| Urumqi       | 510.09   | 0.17 | 534.89   | 0.18 | 551.05   | 0.19 | 573.77   | 0.22 | 626.41   | 0.16 | 741.53   | 0.27 | 908.83   | 0.30 |
| Lanzhou      | 148.60   | 0.20 | 179.21   | 0.25 | 218.74   | 0.39 | 240.98   | 0.23 | 258.46   | 0.27 | 272.26   | 0.23 | 330.47   | 0.30 |
| Hohhot       | 52.03    | 0.01 | 61.42    | 0.00 | 79.17    | 0.19 | 146.42   | 0.05 | 195.60   | 0.23 | 236.43   | 0.27 | 401.46   | 0.32 |
| Yinchuan     | 45.37    | 0.20 | 53.40    | 0.25 | 80.60    | 0.25 | 157.25   | 0.21 | 222.10   | 0.35 | 269.21   | 0.33 | 437.82   | 0.34 |
| Haikou       | 47.50    | 0.50 | 64.43    | 0.37 | 72.52    | 0.45 | 78.36    | 0.45 | 92.48    | 0.35 | 92.48    | 0.35 | 281.51   | 0.49 |
| Xining       | 65.22    | 0.23 | 74.04    | 0.22 | 84.68    | 0.31 | 93.47    | 0.33 | 117.08   | 0.40 | 134.64   | 0.38 | 178.70   | 0.42 |
| Lhasa        | 34.07    | 0.21 | 37.61    | 0.21 | 43.42    | 0.29 | 50.51    | 0.29 | 70.00    | 0.29 | 79.94    | 0.23 | 108.28   | 0.31 |

Table.S3: Expansion rate and vegetation growth rate of built-up areas in provincial capital cities from 1990 to 2020

| City/year    | 1990-1995       |             | 1995-2000       |             | 2000-2005       |             | 2005-2010       |             | 2010-2015       |             | 2015-2020       |             |
|--------------|-----------------|-------------|-----------------|-------------|-----------------|-------------|-----------------|-------------|-----------------|-------------|-----------------|-------------|
|              | Expansion speed | Growth rate |
| Shanghai     | 29.94           | 0.01        | 43.86           | 0.05        | 142.92          | -0.06       | 172.33          | 0.11        | 110.70          | 0.09        | 215.44          | 0.07        |
| Beijing      | 21.20           | -0.01       | 31.66           | -0.03       | 175.21          | 0.07        | 187.42          | 0.03        | 83.26           | 0.13        | 250.75          | 0.02        |
| Guangzhou    | 29.97           | -0.05       | 67.33           | -0.02       | 87.51           | 0.05        | 126.61          | 0.05        | 28.27           | 0.02        | 128.26          | 0.03        |
| Chongqing    | 5.40            | 0.05        | 6.79            | 0.00        | 16.85           | -0.03       | 34.55           | 0.01        | 9.18            | 0.10        | 71.01           | -0.03       |
| Chengdu      | 18.08           | -0.14       | 24.89           | 0.06        | 43.53           | -0.14       | 78.68           | 0.02        | 18.04           | 0.12        | 79.67           | 0.05        |
| Hangzhou     | 4.95            | -0.02       | 17.24           | -0.05       | 57.48           | 0.10        | 76.54           | -0.12       | 68.69           | 0.07        | 127.97          | 0.15        |
| Wuhan        | 5.15            | -0.05       | 13.03           | 0.05        | 26.68           | 0.09        | 47.20           | -0.04       | 45.18           | 0.14        | 131.80          | -0.07       |
| Nanjing      | 17.31           | -0.05       | 12.22           | -0.08       | 49.49           | 0.04        | 57.85           | 0.12        | 28.08           | -0.02       | 48.41           | 0.05        |
| Tianjin      | 13.44           | 0.09        | 16.24           | 0.01        | 73.06           | -0.07       | 130.38          | 0.06        | 31.08           | 0.10        | 74.92           | 0.06        |
| Changsha     | 3.80            | -0.01       | 6.22            | 0.00        | 24.25           | 0.04        | 26.13           | -0.10       | 17.18           | 0.10        | 56.70           | 0.02        |
| Zhengzhou    | 10.42           | 0.14        | 11.80           | -0.14       | 39.09           | 0.01        | 36.06           | -0.06       | 52.70           | 0.13        | 184.39          | 0.04        |
| Jinan        | 15.02           | 0.08        | 14.94           | -0.29       | 35.95           | 0.28        | 52.26           | 0.15        | 27.19           | -0.18       | 63.36           | 0.11        |
| Hefei        | 11.61           | -0.05       | 15.87           | -0.04       | 11.87           | -0.07       | 31.61           | -0.17       | 15.33           | 0.17        | 59.25           | 0.04        |
| Xi'an        | 48.60           | 0.18        | 12.98           | 0.11        | 19.38           | -0.16       | 40.26           | 0.01        | -3.30           | 0.09        | 66.16           | -0.03       |
| Fuzhou       | 7.15            | 0.00        | 8.19            | 0.03        | 6.33            | -0.14       | 18.01           | 0.06        | 52.25           | 0.06        | 25.27           | 0.00        |
| Kunming      | 9.49            | -0.01       | 14.83           | 0.03        | 23.15           | 0.03        | 19.74           | 0.10        | 26.70           | -0.05       | 34.68           | -0.01       |
| Changchun    | 6.69            | 0.26        | 7.16            | -0.01       | 12.83           | 0.06        | 25.21           | -0.03       | 11.57           | 0.08        | 66.79           | 0.02        |
| Shenyang     | 6.84            | 0.02        | 5.94            | 0.00        | 20.75           | 0.07        | 34.04           | 0.04        | 26.50           | 0.05        | 70.95           | 0.06        |
| Shijiazhuang | 9.86            | 0.04        | 21.27           | 0.02        | 12.58           | -0.08       | 25.44           | 0.06        | 23.68           | 0.02        | 58.75           | 0.11        |
| Nanchang     | 8.93            | 0.08        | 3.04            | 0.02        | 13.99           | -0.07       | 22.64           | 0.08        | 15.53           | -0.01       | 35.21           | 0.01        |
| Harbin       | 2.65            | -0.02       | 5.66            | 0.08        | 12.88           | -0.06       | 21.62           | 0.01        | 12.91           | 0.03        | 59.61           | 0.14        |
| Nanning      | 3.73            | -0.04       | 6.74            | 0.00        | 7.60            | -0.03       | 36.06           | 0.03        | 6.82            | -0.02       | 15.08           | -0.01       |
| Guiyang      | 8.17            | 0.00        | 3.08            | 0.05        | 4.56            | 0.04        | 17.21           | 0.06        | 17.89           | 0.02        | 44.94           | 0.07        |
| Taiyuan      | 18.74           | -0.03       | 8.66            | -0.19       | 9.33            | 0.15        | 16.18           | 0.04        | 30.14           | 0.12        | 3.26            | 0.02        |
| Urumqi       | 4.96            | 0.01        | 3.23            | 0.02        | 4.54            | 0.03        | 10.53           | -0.07       | 23.02           | 0.12        | 33.46           | 0.02        |
| Lanzhou      | 6.12            | 0.05        | 7.91            | 0.13        | 4.45            | -0.15       | 3.50            | 0.03        | 2.76            | -0.03       | 11.64           | 0.07        |
| Hohhot       | 1.88            | -0.01       | 3.55            | 0.19        | 13.45           | -0.14       | 9.84            | 0.18        | 8.17            | 0.04        | 33.01           | 0.06        |
| Yinchuan     | 1.61            | 0.06        | 5.44            | 0.00        | 15.33           | -0.04       | 12.97           | 0.14        | 9.42            | -0.02       | 33.72           | 0.01        |
| Haikou       | 3.39            | -0.13       | 1.62            | 0.08        | 1.17            | 0.00        | 2.82            | -0.10       | 3.55            | -0.02       | 37.81           | 0.14        |
| Xining       | 1.76            | -0.01       | 2.13            | 0.09        | 1.76            | 0.02        | 4.72            | 0.07        | 3.51            | -0.02       | 8.81            | 0.04        |
| Lhasa        | 0.71            | 0.00        | 1.16            | 0.07        | 1.42            | 0.00        | 3.89            | 0.00        | 1.99            | -0.06       | 5.67            | 0.07        |

Note: The city ranking refers to the GDP ranking of provincial capital cities in 2020, and the data comes from the statistical yearbooks and bulletins of various regions. The expansion rate is the average annual growth rate of the built-up area of a city, which represents the rate of change of the built-up area of a city in a unit time. In the table, the GDP and expansion rate are sorted from high to low, and the actual data value is replaced by rank. In this study, when  $0 \leq FVC \leq 0.4$ , the pixel is deemed to have no vegetation coverage, when  $0.4 < FVC \leq 1.0$ , the pixel is deemed to have vegetation coverage, and the vegetation coverage rate (VCR) is that the built-up area has vegetation coverage The ratio of the area of the area to the total area of the built-up area.
